# Supplementary material for: Structure–property relationship in charge transporting behaviour of room temperature liquid crystalline perylenebisimides
Source: Royal Society of Chemistry journal article supplement (doi:10.1039/c4tc01806k), 2014-10-02
Supplement: c4tc01806k1.pdf [file c4tc01806k1.pdf]

***Supporting information for***

**Revised Manuscript submitted to *Journal of Materials Chemistry C***

(Manuscript ID TC-ART-08-2014-001806)

**Structure-Property Relationship in Charge Transporting Behaviour of Room  
Temperature Liquid Crystalline Perylenebisimides.**

**K. P. Prajitha,<sup>a,b</sup> S. Chithiravel,<sup>a</sup> K. Krishnamoorthy<sup>\*a,b,c</sup> and S. K. Asha<sup>\*a,b,c</sup>**

- a) Polymer Science and Engineering Division, CSIR-National Chemical Laboratory, Dr Homi Bhabha Road, Pune 411008, India.
- b) Academy of Scientific and Innovative Research, New Delhi, India
- c) CSIR-Network Institutes of Solar Energy, New Delhi, India

### Synthesis and Characterization:

Per-PDP-Diol was synthesized as reported in our earlier report.<sup>1</sup> Yield: 11.0 g (74 %); m.p. > 400 °C; <sup>1</sup>H NMR (CDCl<sub>3</sub>+TFA): d = 8.91 (m, 8H; perylene), 6.89–7.16 (m, 6H; ArH-PDP), 2.39 (t, 4H; Ar-CH<sub>2</sub>), 1.53 (t, 4H; Ar-CH<sub>2</sub>-CH<sub>2</sub>), 1.0–1.4 (br, 48H; aliphatic CH<sub>2</sub>), 0.84 ppm (t, 6H; terminal CH<sub>3</sub>); <sup>13</sup>C NMR: 166.27, 163.21, 162.65, 160.62, 155.86, 143.08, 136.66, 134.16, 130.32, 127.00, 126.14, 124.92, 123.12, 122.59, 115.03, 111.82, 106.19, 32.17, 31.28, 29.92, 29.60, 22.85, 13.81 ppm; FTIR: (ν) 3359 (OH stretch), 2922, 2853, 1698 (C=O imide), 1656, 1592, 1498, 1403, 1360, 1348, 1300, 1250, 1231, 1198, 1176, 967, 862, 813, 796, 750 cm<sup>-1</sup>; MALDI-TOF (dithranol matrix): m/z calcd for C<sub>66</sub>H<sub>78</sub>N<sub>2</sub>O<sub>6</sub>: 995.34; found: 996.65 [M+1], 1018.58 [M + Na].

**Synthesis of ester-functionalized perylenebisimides:** 3, 4, 5-Tri (alkoxy) benzoic acid was synthesized using literature procedure<sup>2</sup> and converted to the acid chloride by reflux in an excess amount of thionyl chloride. The conversion was monitored by IR spectroscopy.

### Synthesis of PBI-E4:

Per-PDP-Diol (0.5 g, 0.5 mmol) was dissolved in dry THF (15 mL) and the solution was cooled to 0 °C. A small amount of triethylamine was added as catalyst. 3, 4, 5 Tri (butyloxy)benzoyl chloride (0.36 g, 1.1 mmol) dissolved in dry THF (5 mL) was added drop wise over a period of 10 min while the temperature was maintained at 0 °C. The reaction mixture was left stirring under ice-cold conditions for 4 h. For workup, THF was distilled and removed. The crude product was purified by column chromatography in DCM/methanol. Yield: 0.67 g (58 %); m.p. 264 °C; <sup>1</sup>H NMR (CDCl<sub>3</sub>): d= 8.7–8.9 (m, 8H; perylene), 7.44 (s, 4H; Ar-H), 7.25–7.40 (m, 6H; ArH - PDP), 4.06 (t, 12H; Ar-O-CH<sub>2</sub>), 2.48 (t, 4H; PDP Ar-CH<sub>2</sub>), 1.0–1.9 (m, 72H; aliphatic CH<sub>2</sub>), 0.87 ppm (m, 24H; terminal CH<sub>3</sub>); <sup>13</sup>C NMR: 164.70, 163.42, 152.95, 151.46, 150.50, 146.75, 142.93, 142.13, 135.08, 132.04, 131.16, 129.96, 126.78, 123.86, 123.39, 122.00, 120.38, 108.50, 73.60, 69.24, 31.92, 31.13, 30.33, 29.37, 26.09, 22.69, 14.11; FTIR: (ν) 2962 (CH<sub>stretch</sub>), 2923, 2853, 1730 (C=O<sub>ester</sub>), 1702 (C=O<sub>imide</sub>), 1663, 1593, 1503, 1465, 1429, 1359, 1337, 1261, 1198, 1097, 1025, 970, 804, 751 cm<sup>-1</sup>; MALDI-TOF (dithranol matrix): m/z calcd for C<sub>104</sub>H<sub>136</sub>N<sub>2</sub>O<sub>14</sub>: 1656.91; found: 1657.98 [M<sup>+</sup>], 1674.93 [M<sup>+</sup> Na]; elemental analysis calcd (%): C 76.34, H 8.25, N 1.71; found: C 75.62, H 8.66, N 1.64.

**Synthesis of PBI-E5:** A similar procedure to that of PBI-E4 was adopted by using Per-PDP-Diol 0.5 g (0.5 mmol) and 3,4,5 Tri (pentyloxy) benzoyl chloride (0.39 g, 1.1 mmol). Yield: 0.63 g (51 %); m.p. 244 °C; <sup>1</sup>H NMR (CDCl<sub>3</sub>): d = 8.7–8.9 (m, 8H; perylene), 7.44 (s, 4H; Ar-H), 7.25–7.40 (m, 6H; ArH - PDP), 4.06 (t, 12H; Ar-O-CH<sub>2</sub>), 2.48 (t, 4H; PDP Ar-CH<sub>2</sub>), 1.0–1.9 (m, 84H; aliphatic CH<sub>2</sub>), 0.87 ppm (m, 24H; terminal CH<sub>3</sub>); <sup>13</sup>C NMR: 164.70, 163.42, 152.95, 151.46, 150.50, 146.75, 142.93, 142.13, 135.08, 132.04, 131.16, 129.96, 126.78, 123.86, 123.39, 122.00, 120.38, 108.50, 73.60, 69.24, 31.92, 31.13, 30.33, 29.37, 26.09, 22.69, 14.11; FTIR: (ν) 2962 (-CH<sub>stretch</sub>), 2923, 2853, 1730 (C=O<sub>ester</sub>), 1702 (C=O<sub>imide</sub>), 1663, 1593, 1503, 1465, 1429, 1359, 1337, 1261, 1199, 1098, 1025, 971, 804, 752 cm<sup>-1</sup>; MALDI-TOF (dithranol matrix): m/z calcd for C<sub>110</sub>H<sub>148</sub>N<sub>2</sub>O<sub>14</sub> : 1722.2; found: 1742.1 [M<sup>+</sup> Na], 1758.22 [M<sup>+</sup> K]; elemental analysis calcd (%): C 76.80, H 8.55, N 1.63; found: C 75.98, H 8.94, N 1.62.

**Synthesis of PBI-E6:** A similar procedure to that of PBI-E4 was adopted by using Per-PDP-Diol 0.5 g (0.5 mmol) and 3,4,5 Tri (hexyloxy) benzoyl chloride (0.44 g, 1.1 mmol). Yield: 0.64 g (53 %); m.p. 239 °C; <sup>1</sup>H NMR (CDCl<sub>3</sub>): d = 8.7–8.9 (m, 8H; perylene), 7.44 (4H, s ; Ar-H), 7.25–7.40 (m, 6H; ArH - PDP), 4.06 (t, 12H; Ar-O-CH<sub>2</sub>), 2.48 (t, 4H; PDP Ar-CH<sub>2</sub>), 1.0–1.9 (m, 982H; aliphatic CH<sub>2</sub>), 0.87 ppm (m, 24H; terminal CH<sub>3</sub>); <sup>13</sup>C NMR: 164.70, 163.42, 152.95, 151.46, 150.50, 146.75, 142.93, 142.13, 135.08, 132.04, 131.16, 129.96, 126.78, 123.86, 123.39, 122.00, 120.38, 108.50, 73.60, 69.24, 31.92, 31.13, 30.33, 29.37, 26.09, 22.69, 14.11; FTIR: (ν) 2962 (-CH<sub>stretch</sub>), 2923, 2853, 1730 (C=O<sub>ester</sub>), 1702 (C=O<sub>imide</sub>), 1663, 1593, 1503, 1465, 1429, 1359, 1337, 1260, 1199, 1098, 1023, 969, 805, 750 cm<sup>-1</sup>; MALDI-TOF (dithranol matrix): m/z calcd for C<sub>116</sub>H<sub>130</sub>N<sub>2</sub>O<sub>14</sub> : 1806.5; found: 1806.57 [M<sup>+</sup>], 1826.51 [M<sup>+</sup> Na]; elemental analysis calcd (%): C 77.21, H 8.83, N 1.55; found: C 76.78, H 8.54, N 1.72.

**Synthesis of PBI-E7:** A similar procedure to that of PBI-E4 was adopted by using Per-PDP-Diol 0.5 g (0.5 mmol) and 3,4,5 Tri (heptyloxy) benzoyl chloride (0.48 g, 1.1 mmol). Yield: 0.59 g (49 %); m.p. 227 °C; <sup>1</sup>H NMR (CDCl<sub>3</sub>): d=8.7–8.9 (dd, 8H; perylene), 7.44 (s, 4H; Ar-H), 7.25–7.40 (m, 6H; ArH - PDP), 4.06 (t, 12H; Ar-O-CH<sub>2</sub>), 2.48 (t, 4H; PDP Ar-CH<sub>2</sub>), 1.0–1.9 (m, 112H; aliphatic CH<sub>2</sub>), 0.87 ppm (m, 24H; terminal CH<sub>3</sub>); <sup>13</sup>C NMR: d=164.70, 163.42, 152.95, 151.46, 150.50, 146.75, 142.93, 142.13, 135.08, 132.04, 131.16, 129.96, 126.78, 123.86, 123.39, 122.00, 120.38, 108.50, 73.60, 69.24, 31.92, 31.13, 30.33, 29.37, 26.09, 22.69, 14.11;

FTIR: ( $\nu$ ) 2962 ( $\text{CH}_{\text{stretch}}$ ), 2923, 2853, 1730 ( $\text{C}=\text{O}_{\text{ester}}$ ), 1702 ( $\text{C}=\text{O}_{\text{imide}}$ ), 1663, 1593, 1503, 1465, 1429, 1359, 1337, 1260, 1199, 1098, 1025, 970, 805, 751  $\text{cm}^{-1}$ ; MALDI-TOF (dithranol matrix):  $m/z$  calcd for  $\text{C}_{122}\text{H}_{172}\text{N}_2\text{O}_{14}$  : 1890; found: 1910.32 [ $\text{M}^+ \text{Na}$ ], 1926.27 [ $\text{M}^+ \text{K}$ ]; elemental analysis calcd (%): C 77.58, H 9.07, N 1.48; found: C 76.84, H 9.63, N 1.60.

**Synthesis of PBI-E8:** A similar procedure to that of PBI-E4 was adopted by using Per-PDP-Diol 0.5 g (0.5 mmol) and 3,4,5 Tri (octyloxy) benzoyl chloride (0.52 g, 1.1 mmol). Yield: 0.62 g (52 %); m.p. 221 °C;  $^1\text{H}$  NMR ( $\text{CDCl}_3$ ):  $\delta$ =8.7–8.9 (dd, 8H; perylene), 7.44 (s, 4H; Ar-H), 7.25–7.40 (m, 6H; ArH - PDP), 4.06 (t, 12H; Ar-O- $\text{CH}_2$ ), 2.48 (t, 4H; PDP Ar- $\text{CH}_2$ ), 1.0–1.9 (m, 134H; aliphatic  $\text{CH}_2$ ), 0.87 ppm (m, 24H; terminal  $\text{CH}_3$ );  $^{13}\text{C}$  NMR:  $\delta$ =164.70, 163.42, 152.95, 151.46, 150.50, 146.75, 142.93, 142.13, 135.08, 132.04, 131.16, 129.96, 126.78, 123.86, 123.39, 122.00, 120.38, 108.50, 73.60, 69.24, 31.92, 31.13, 30.33, 29.37, 26.09, 22.69, 14.11; FTIR: ( $\nu$ ) 2962 ( $\text{CH}_{\text{stretch}}$ ), 2923, 2853, 1730 ( $\text{C}=\text{O}_{\text{ester}}$ ), 1702 ( $\text{C}=\text{O}_{\text{imide}}$ ), 1663, 1593, 1503, 1465, 1429, 1359, 1337, 1260, 1199, 1098, 1025, 972, 804, 751  $\text{cm}^{-1}$ ; MALDI-TOF (dithranol matrix):  $m/z$  calcd for  $\text{C}_{128}\text{H}_{184}\text{N}_2\text{O}_{14}$ : 1972.2 found: 1974.4 [ $\text{M}^+ \text{Na}$ ], 2010.4 [ $\text{M}^+ \text{K}$ ]; elemental analysis calcd (%): C 77.93, H 9.30, N 1.42 found: C 77.49, H 9.62, N 1.43.

**Synthesis of PBI-E9:** A similar procedure to that of PBI-E4 was adopted by using Per-PDP-Diol 0.5 g (0.5 mmol) and 3,4,5 Tri (nonyloxy) benzoyl chloride (0.57 g, 1.1 mmol). Yield: 0.61 g (51%); m.p. 202°C;  $^1\text{H}$  NMR ( $\text{CDCl}_3$ ):  $\delta$ =8.7–8.9 (dd, 8H; perylene), 7.44 (4H, s; Ar-H), 7.25–7.40 (m, 6H; ArH - PDP), 4.06 (t, 12H; Ar-O- $\text{CH}_2$ ), 2.48 (t, 4H; PDP Ar- $\text{CH}_2$ ), 1.0–1.9 (m, 148H; aliphatic  $\text{CH}_2$ ), 0.87 ppm (m, 24H; terminal  $\text{CH}_3$ );  $^{13}\text{C}$  NMR:  $\delta$ =164.70, 163.42, 152.95, 151.46, 150.50, 146.75, 142.93, 142.13, 135.08, 132.04, 131.16, 129.96, 126.78, 123.86, 123.39, 122.00, 120.38, 108.50, 73.60, 69.24, 31.92, 31.13, 30.33, 29.37, 26.09, 22.69, 14.11; FTIR: ( $\nu$ ) 2962 ( $\text{CH}_{\text{stretch}}$ ), 2923, 2853, 1730 ( $\text{C}=\text{O}_{\text{ester}}$ ), 1702 ( $\text{C}=\text{O}_{\text{imide}}$ ), 1663, 1593, 1503, 1465, 1429, 1359, 1337, 1260, 1199, 1098, 1025, 970, 806, 752  $\text{cm}^{-1}$ ; MALDI-TOF (dithranol matrix):  $m/z$  calcd for  $\text{C}_{134}\text{H}_{196}\text{N}_2\text{O}_{14}$  : 2059.99; found: 2058.99; [ $\text{M}^+$ ], 2078.39 [ $\text{M}^+ \text{Na}$ ], 2095.39 [ $\text{M}^+ \text{K}$ ]; elemental analysis calcd (%): C 78.24, H 9.5, N 1.36; found: C 77.54, H 10.05, N 1.37.

**Synthesis of PBI-E10:** A similar procedure to that of PBI-E4 was adopted by using Per-PDP-Diol 0.5 g (0.5 mmol) and 3,4,5 Tri (decyloxy) benzoyl chloride (0.67 g, 1.1 mmol). Yield: 0.68 g (55 %); m.p. 213 °C; <sup>1</sup>H NMR (CDCl<sub>3</sub>): δ=8.7–8.9 (dd, 8H; perylene), 7.44 (s, 4H; Ar-H), 7.25–7.40 (m, 6H; ArH - PDP), 4.06 (t, 12H; Ar-O-CH<sub>2</sub>), 2.48 (t, 4H; PDP Ar-CH<sub>2</sub>), 1.0–1.9 (m, 160H; aliphatic CH<sub>2</sub>), 0.87 ppm (m, 24H; terminal CH<sub>3</sub>); <sup>13</sup>C NMR: δ=164.70, 163.42, 152.95, 151.46, 150.50, 146.75, 142.93, 142.13, 135.08, 132.04, 131.16, 129.96, 126.78, 123.86, 123.39, 122.00, 120.38, 108.50, 73.60, 69.24, 31.92, 31.13, 30.33, 29.37, 26.09, 22.69, 14.11; FTIR: (ν) 2962 (CH<sub>stretch</sub>), 2923, 2853, 1730 (C=O<sub>ester</sub>), 1702 (C=O<sub>imide</sub>), 1663, 1593, 1503, 1465, 1429, 1359, 1337, 1260, 1199, 1098, 1023, 971, 806, 751 cm<sup>-1</sup>; MALDI-TOF (dithranol matrix): m/z calcd for C<sub>140</sub>H<sub>208</sub>N<sub>2</sub>O<sub>14</sub>: 2141.56; found: 2142.56 [M<sup>+</sup>], 2176.39 [M<sup>+</sup> Na]; elemental analysis calcd (%): C 78.53, H 9.7, N 1.31; found: C 77.83, H 9.6, N 1.26.

**Synthesis of PBI-E11:** A similar procedure to that of PBI-E4 was adopted by using Per-PDP-Diol 0.5 g (0.5 mmol) and 3,4,5 Tri (undecyloxy) benzoyl chloride (0.77 g, 1.1 mmol). Yield: 0.60 g (52%); m.p. 200 °C; <sup>1</sup>H NMR (CDCl<sub>3</sub>): δ=8.7–8.9 (dd, 8H; perylene), 7.44 (s, 4H; Ar-H), 7.25–7.40 (m, 6H; ArH - PDP), 4.06 (t, 12H; Ar-O-CH<sub>2</sub>), 2.48 (t, 4H; PDP Ar-CH<sub>2</sub>), 1.0–1.9 (m, 160H; aliphatic CH<sub>2</sub>), 0.87 ppm (m, 24H; terminal CH<sub>3</sub>); <sup>13</sup>C NMR: δ=164.70, 163.42, 152.95, 151.46, 150.50, 146.75, 142.93, 142.13, 135.08, 132.04, 131.16, 129.96, 126.78, 123.86, 123.39, 122.00, 120.38, 108.50, 73.60, 69.24, 31.92, 31.13, 30.33, 29.37, 26.09, 22.69, 14.11; FTIR: (ν) 2962 (-CH<sub>stretch</sub>), 2923, 2853, 1730 (C=O<sub>ester</sub>), 1702 (C=O<sub>imide</sub>), 1663, 1593, 1503, 1465, 1429, 1359, 1337, 1260, 1199, 1098, 1025, 970, 805, 751 cm<sup>-1</sup>; MALDI-TOF (dithranol matrix): m/z calcd for C<sub>146</sub>H<sub>220</sub>N<sub>2</sub>O<sub>14</sub>: 2227.3; found: 2246.95 [M<sup>+</sup> Na]; elemental analysis calcd (%): C 78.80, H 9.87, N 1.26; found: C 77.9, H 9.37, N 0.92.

**Figure S1.**  $^1\text{H}$  NMR spectra of **PBI-En** molecules recorded in  $\text{CDCl}_3$ .

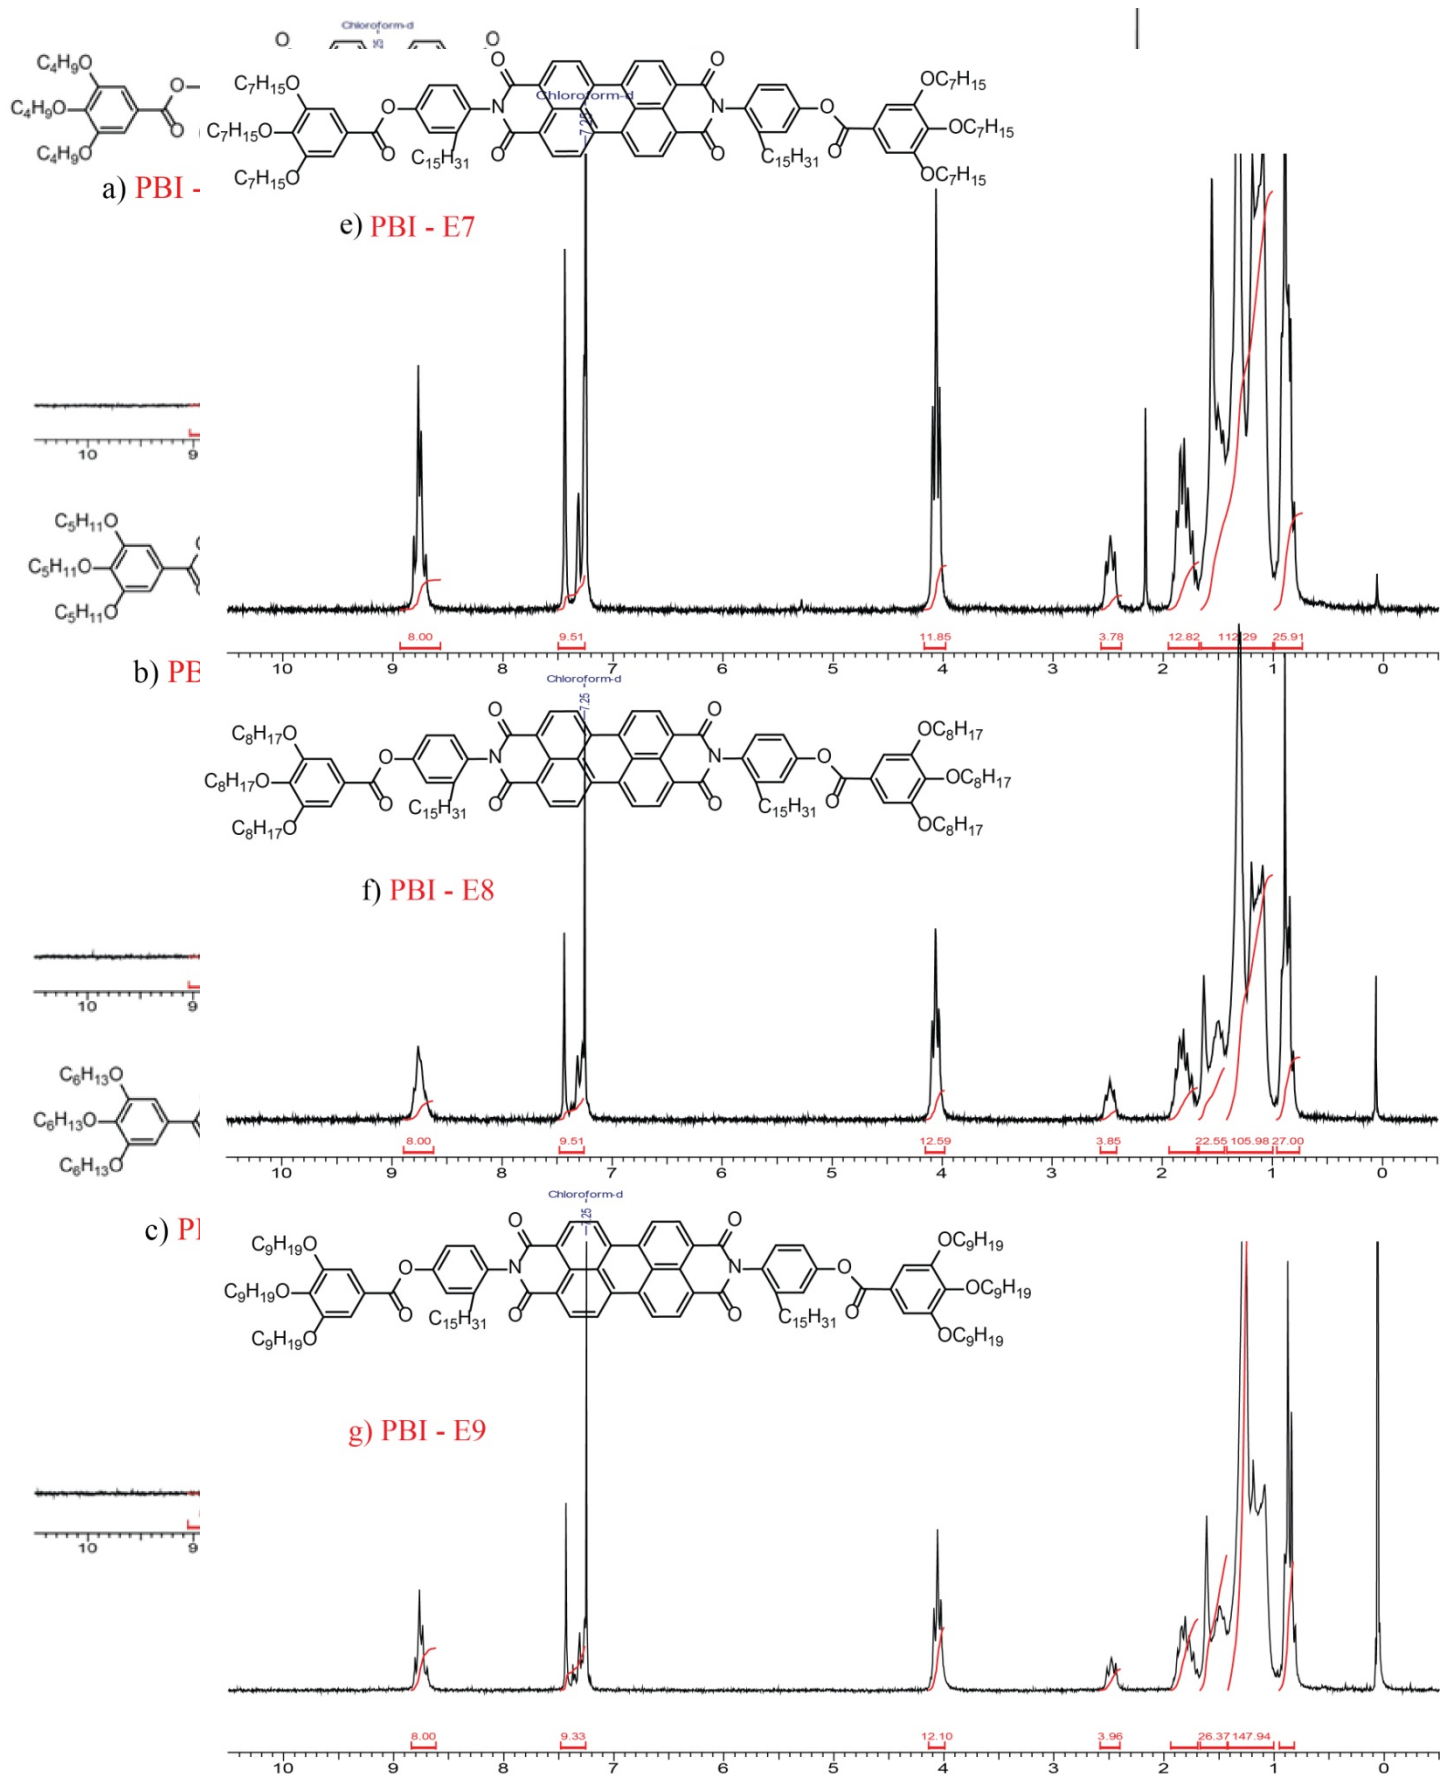

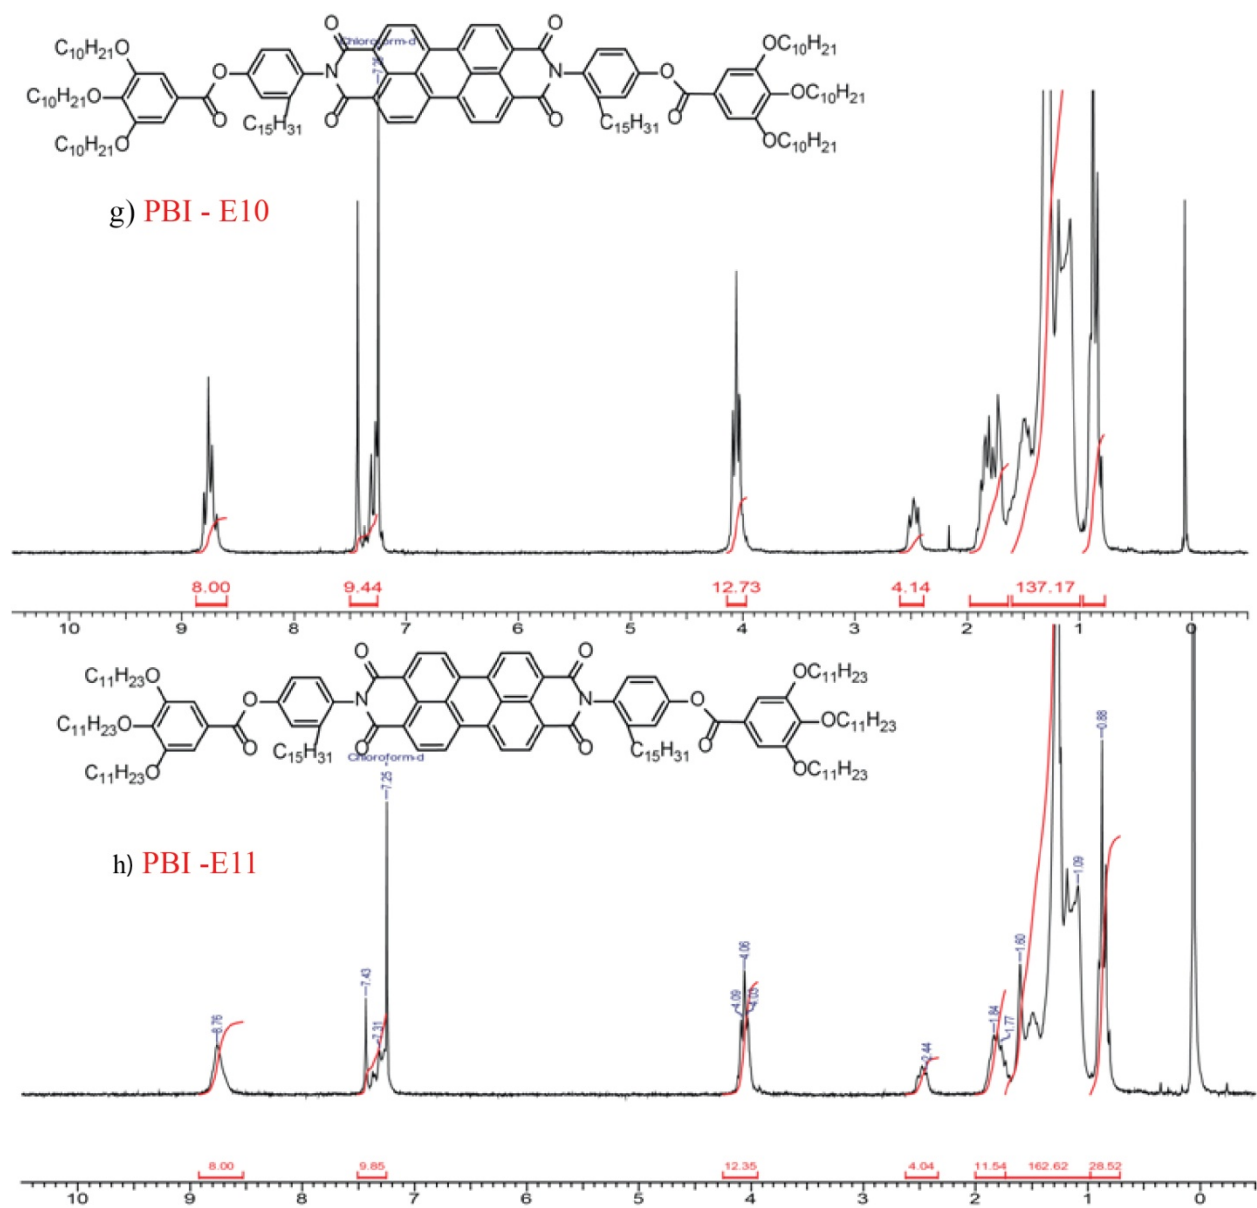

**Figure S2.** Maldi- TOF spectra of **PBI-En** molecules in dithranol matrix.

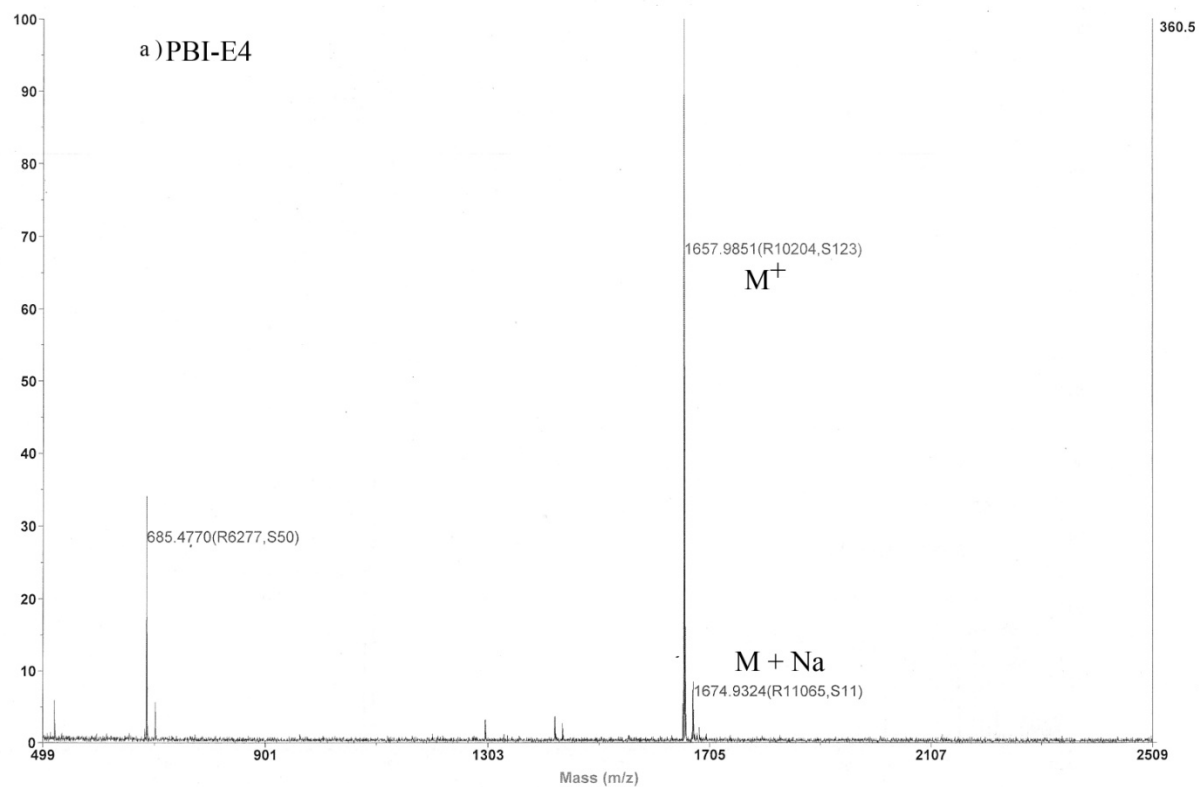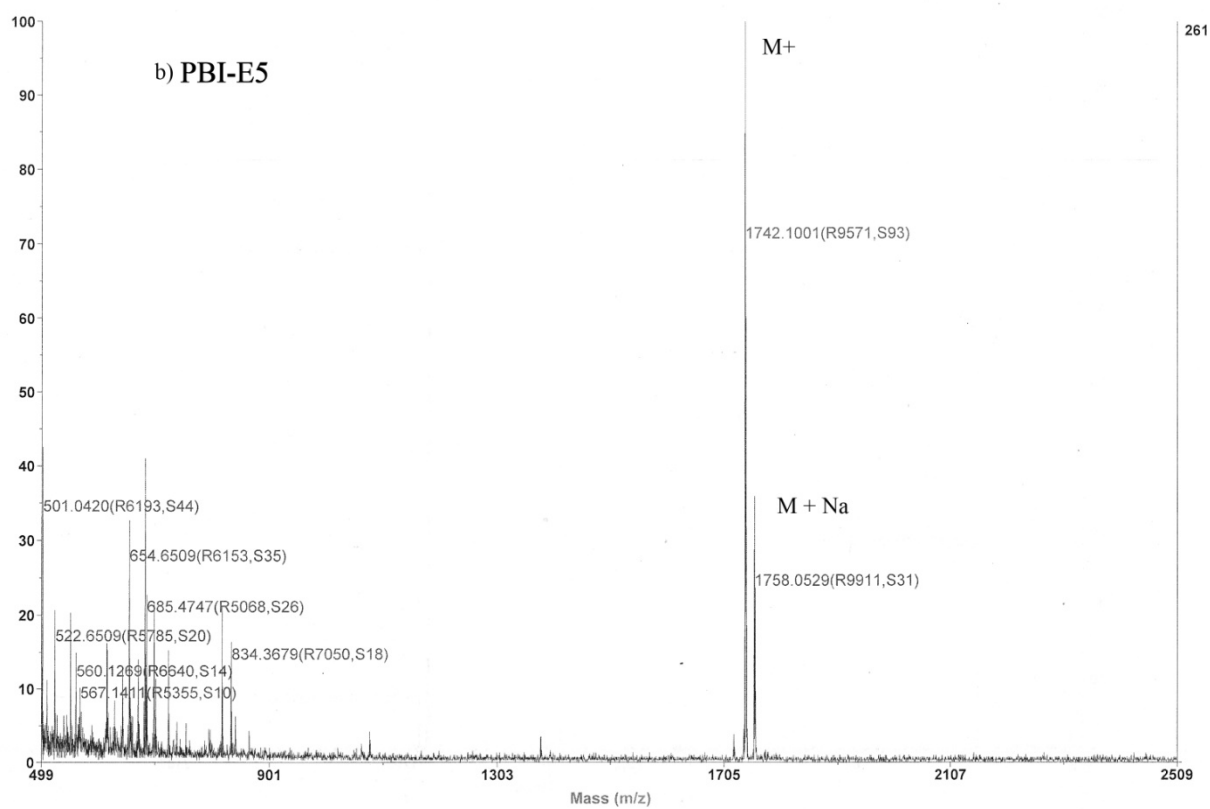





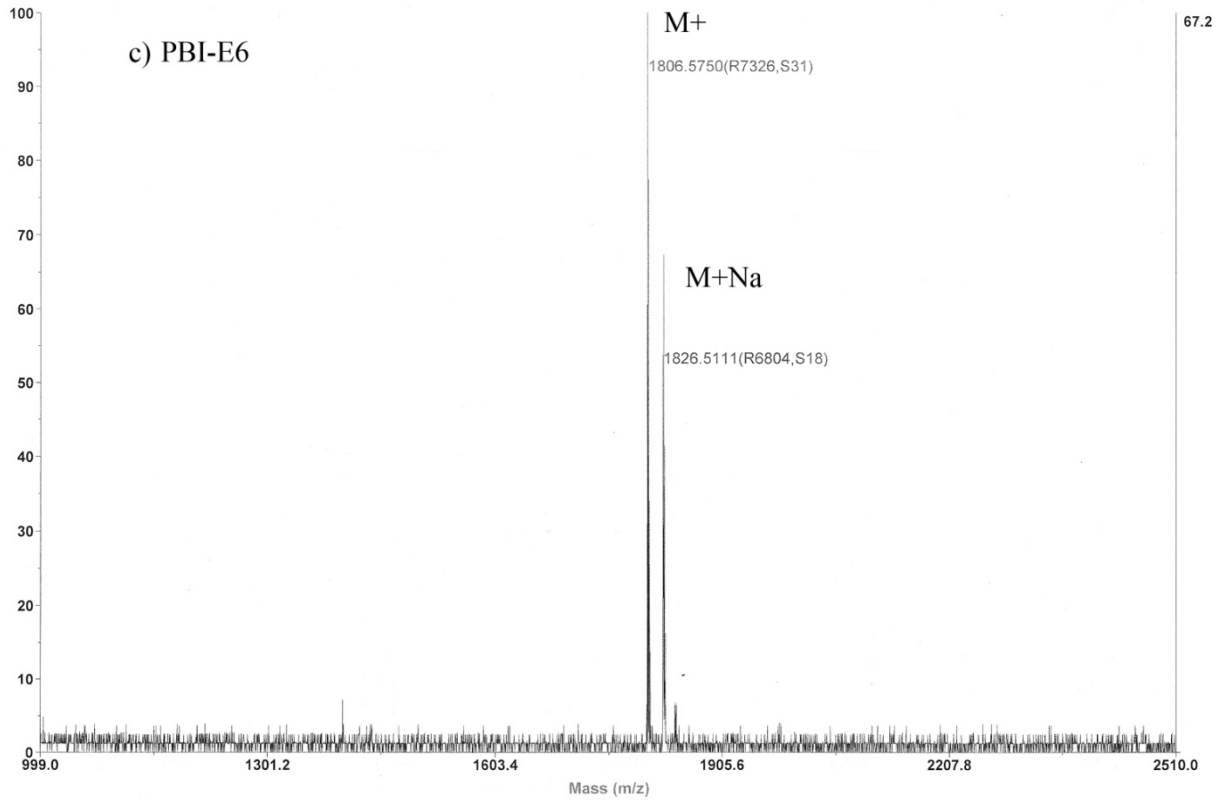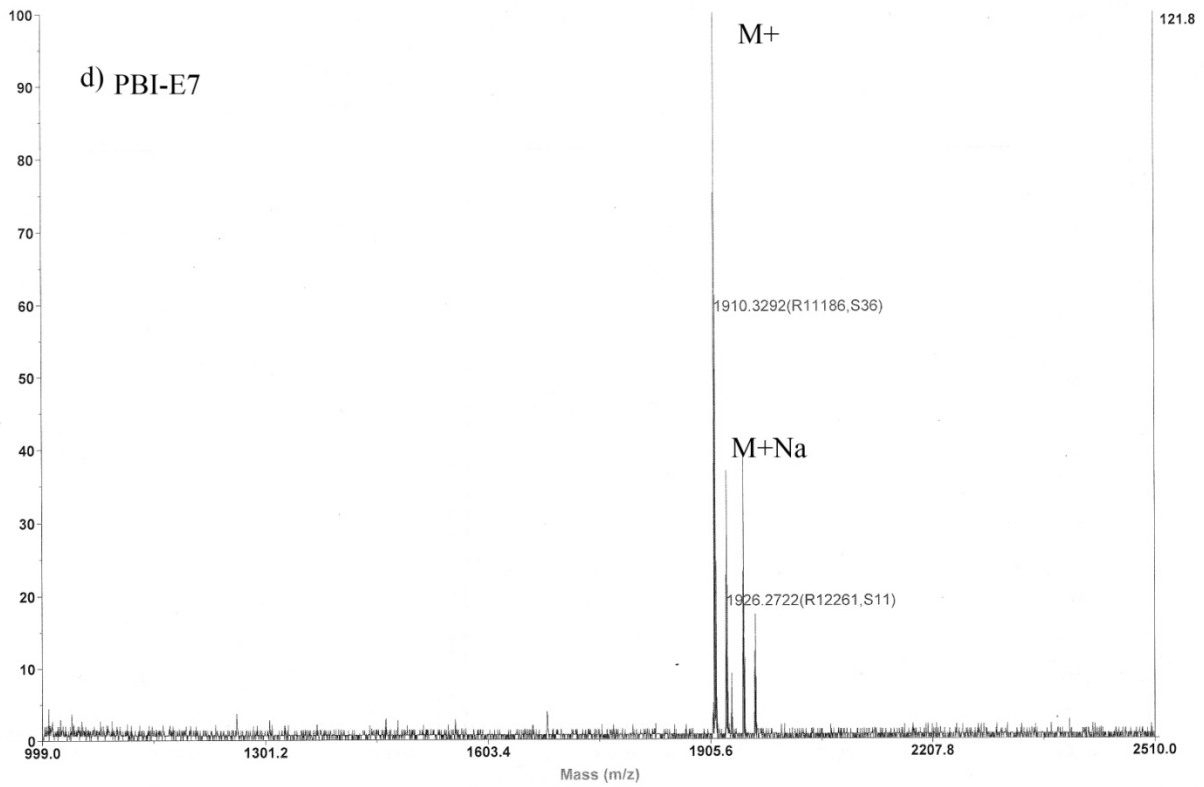

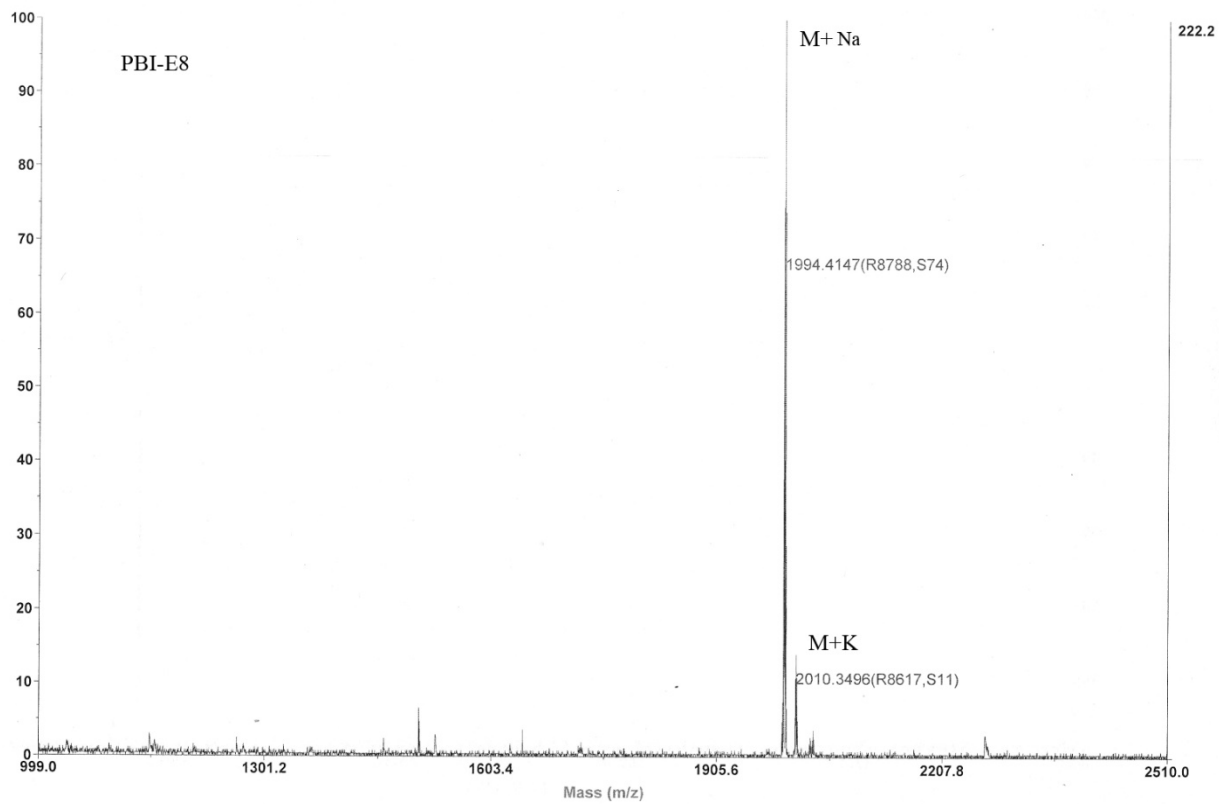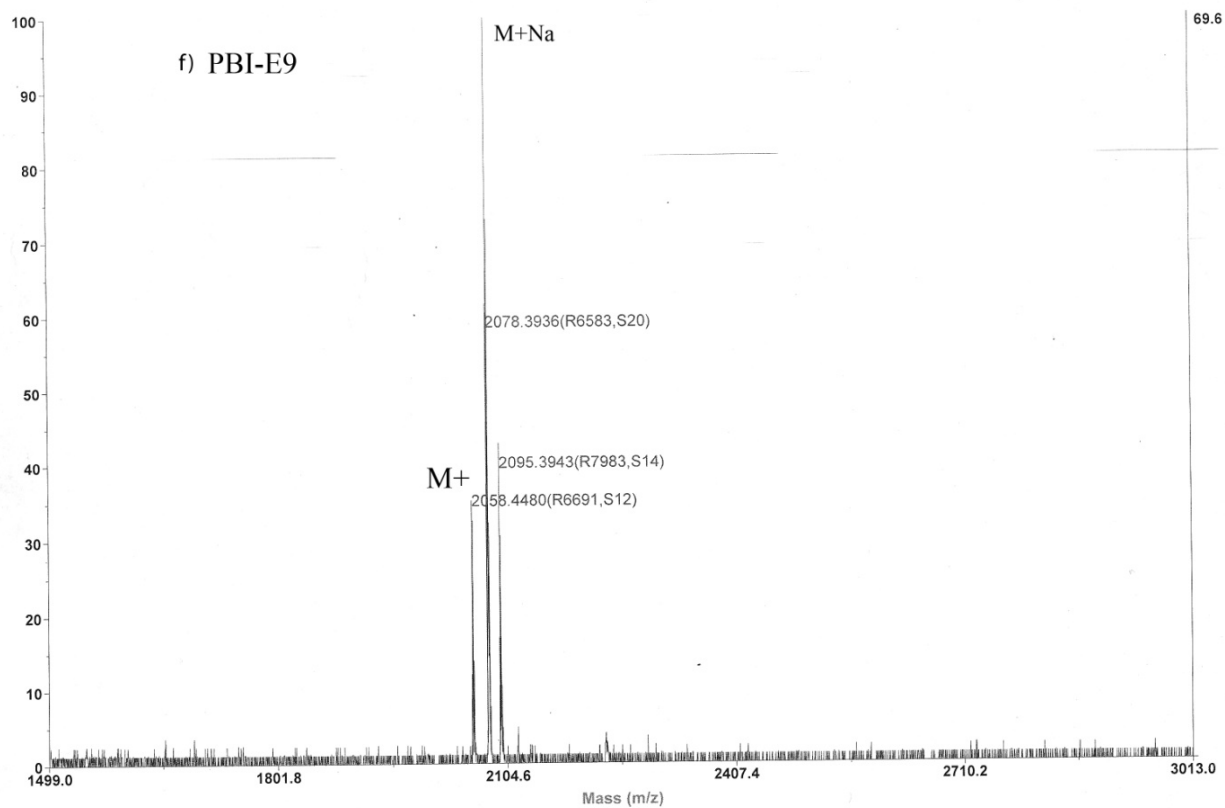

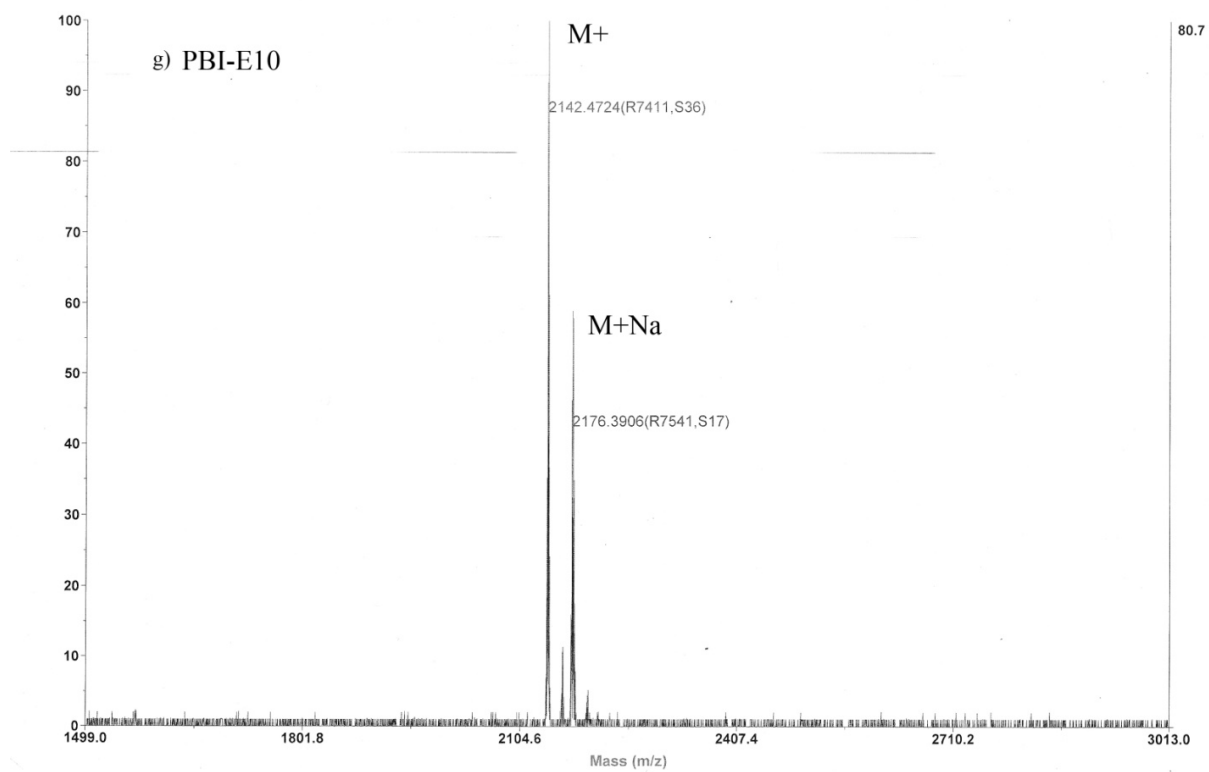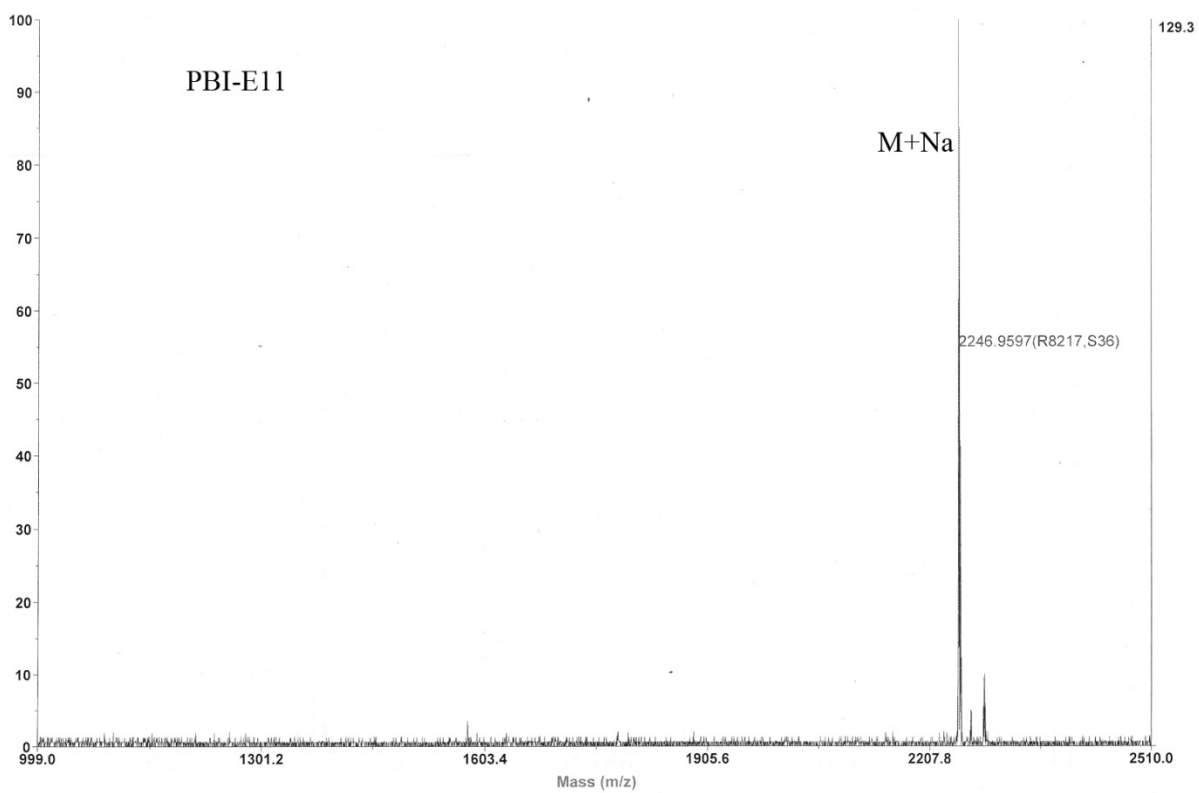

Figure S3. Gel permeation chromatograms of **PBI-En** molecules in  $\text{CHCl}_3$ .

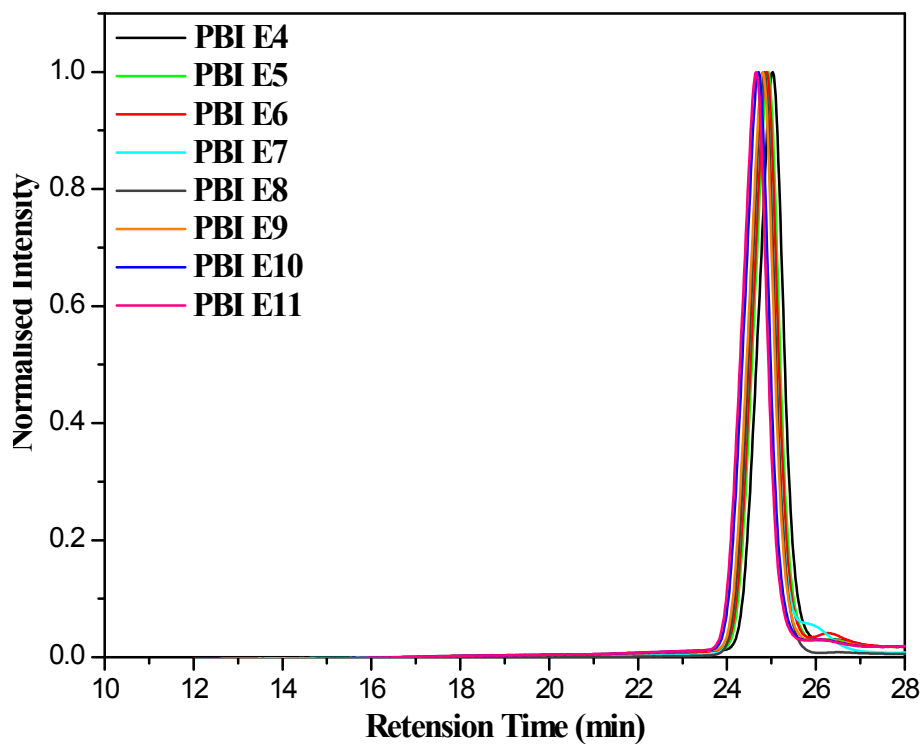

Figure S4. Thermogravimetric analysis (TGA) of **PBI-En** molecules under N<sub>2</sub> atmosphere.

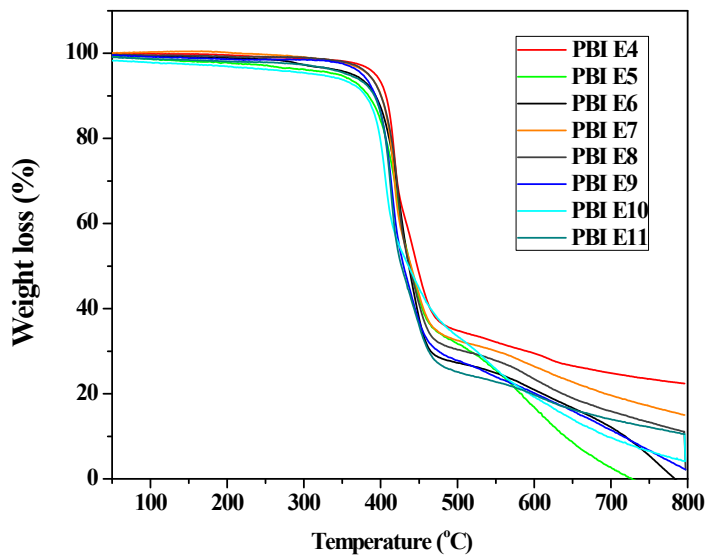

**Figure S5:** DSC slow cooling thermogram of **PBI-E11** in the second cooling cycle at the rate of  $1^{\circ}\text{C} / \text{minute}$ .

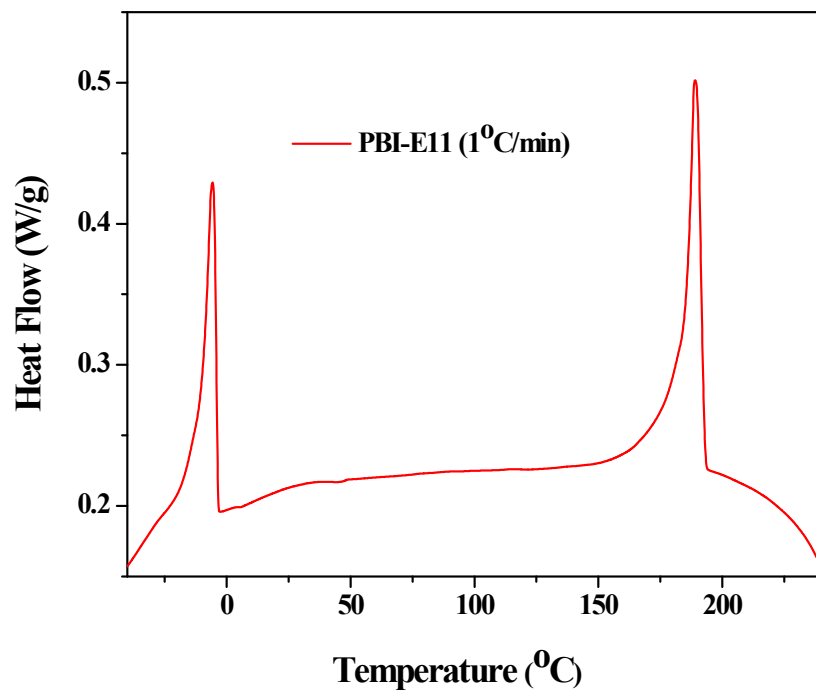

**Figure S6.** Polarized Light microscopic images of liquid crystalline **PBI-En** molecules (under crossed polarizer) at various temperatures.

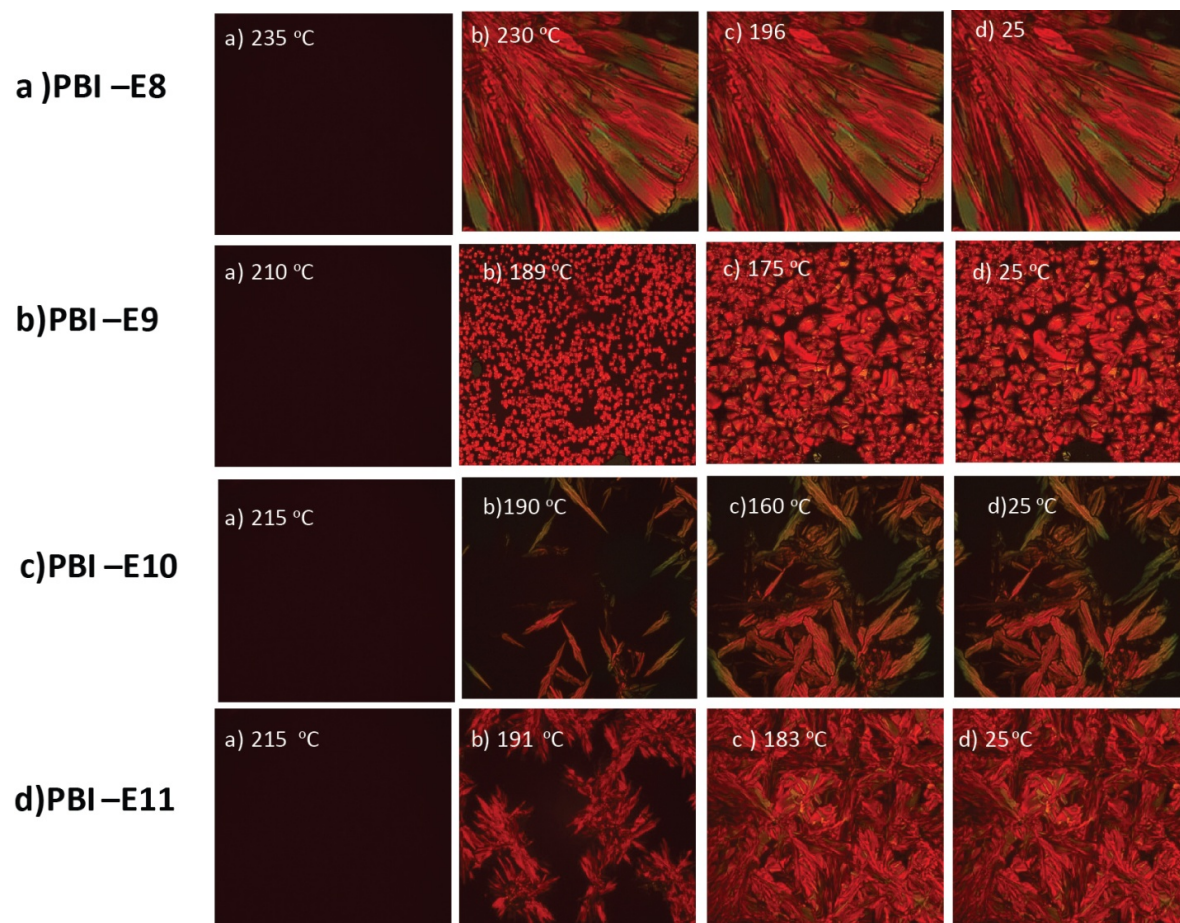

**Figure S7:** The room temperature XRD pattern (expanded in the range  $2\theta = 5-10^\circ$ ) of annealed samples of a) **PBI-E12** and b) **PBI-E11** from the isotropic melt.

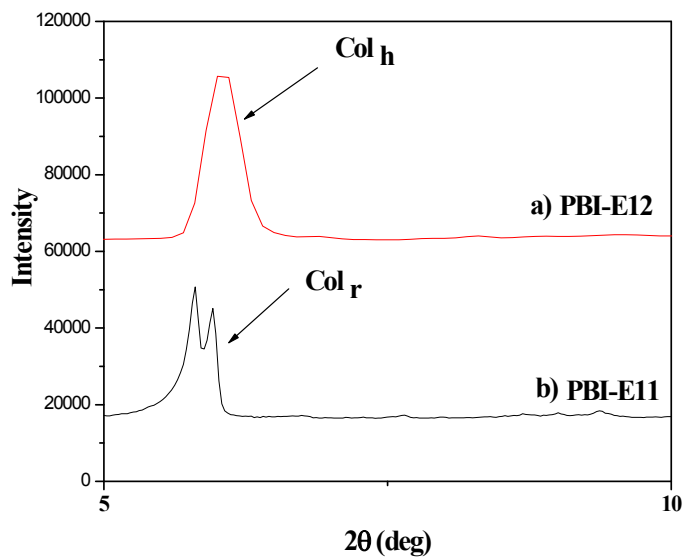

**Figure S8:** Variable temperature XRD pattern (expanded in the range  $2\theta = 5-30^\circ$ ) of **PBI-E9** at high temperature (191°C) and at room temperature (25°C).

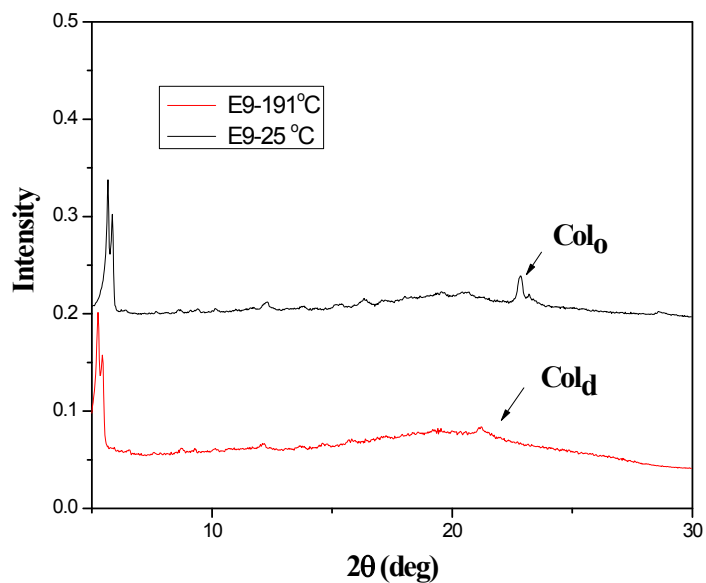



**Figure S9.** (a) XRD pattern (expanded in the range  $2\theta = 1.5\text{-}4^\circ$ ) of **PBI-En** molecules annealed from the isotropic melt to room temperature ( $25^\circ\text{C}$ ) (b)  $d_{100}$  distance in ( $\text{A}^\circ$ ) against number of carbon atoms in the terminal spacer of **PBI-En** molecules.

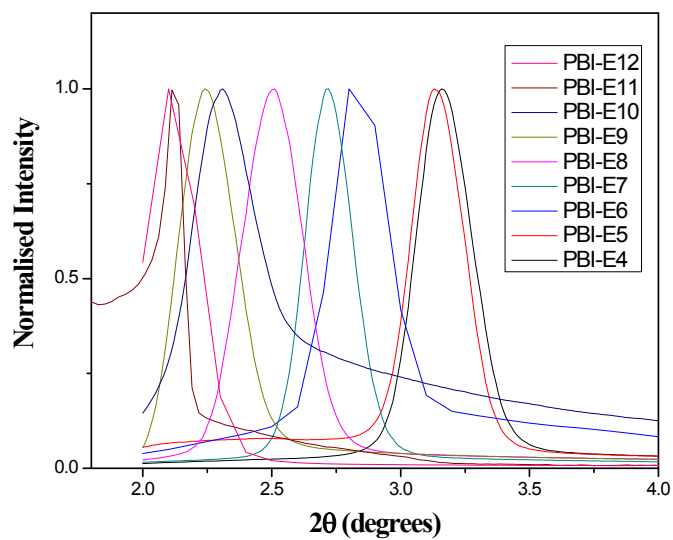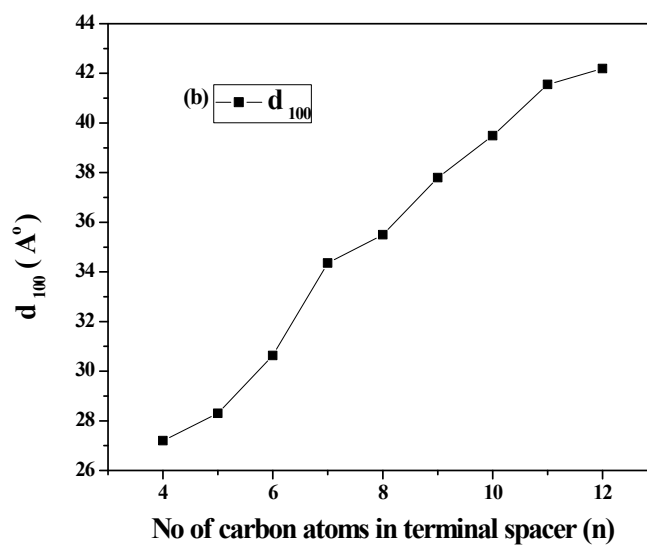

**Figure S10:** Room temperature wide angle X-ray diffraction patterns of crystalline **PBI-En** molecules ( $n = 4-7$ ) in the  $2\theta$  range 2 - 30°.

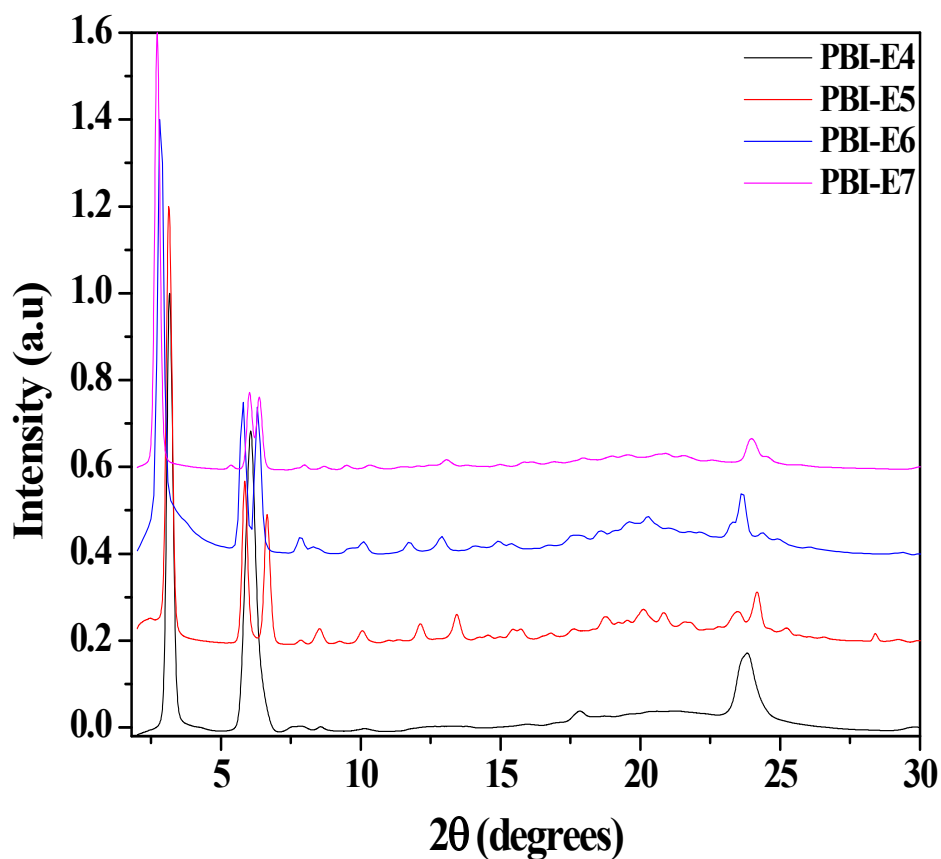

References:

- 1) G. A. Bhavsar and S. K. Asha, *Chem. Eur. J.*, 2011, **17**, 12646.
- 2) J. P. A. Custers, M. C. Hersmis, J. Meuldijk, J. A. J. M. Vekemans and L. A. Hulshof, *Org. Proc. Res. Dev.*, 2002, **6**, 645.
